# Supplementary material for: Novel Polyclonal Antibody Raised against Tetrodotoxin Using Its Haptenic Antigen Prepared from 4,9-anhydrotetrodotoxin Reacted with 1,2-Ethaneditiol and Further Reacted with Keyhole Limpet Hemocyanin
Source: MDPI journal article supplement (doi:10.3390/toxins11100551), 2019-09-20
Supplement: s1 [file s1]

# Supplementary Materials: Novel Polyclonal Antibody Raised against Tetrodotoxin Using Its Haptenic Antigen Prepared from 4,9-anhydrotetrodotoxin Reacted with 1,2-Ethanedithiol and Further Reacted with Keyhole Limpet Hemocyanin

Shigeru Sato, Suzuka Takaishi, Ko Yasumoto and Shugo Watabe

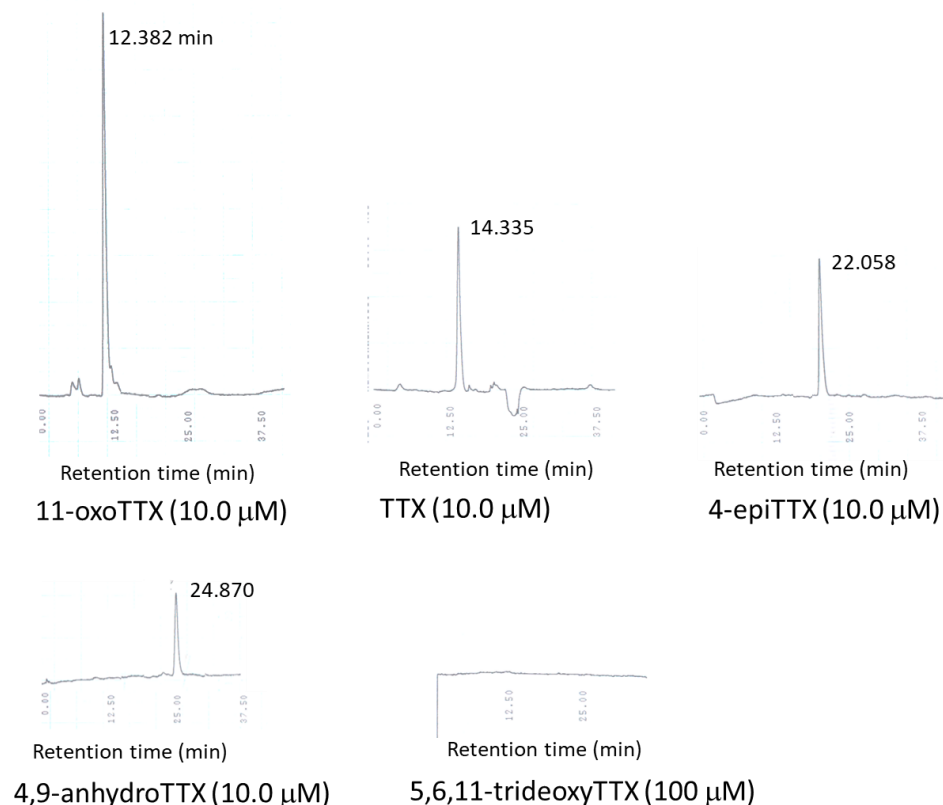

**Figure S1.** Fluorometric HPLC analysis of isolated TTX analogs. In Figure 5, these isolated toxins were analyzed on ELISA.

**Table S1.** Reaction of 4,9anhydro-TTX with DTT expressed as concentration of the remaining free toxins measured by HPLC-FLD in function of time.

| Min | Conc. (μM)     |     |          |          |
|-----|----------------|-----|----------|----------|
|     | 4,9anhydro-TTX | TTX | 6epi-TTX | 4epi-TTX |
| 0   | 1099           | ND  | ND       | ND       |
| 15  | 162            | ND  | ND       | ND       |
| 30  | ND             | ND  | ND       | ND       |

Reaction mixture was analyzed by the fluorometric HPLC [38]. ND means not detected.

**Table S2.** The reactivity of the antibody against KLH in ELISA.

| TTX (nM)  | OD ( <i>n</i> = 3) |       | KLH (ppm) | OD ( <i>n</i> = 3) |       |
|-----------|--------------------|-------|-----------|--------------------|-------|
|           | mean               | SE    |           | mean               | SE    |
| 0         | 0.702              | 0.023 | 0         | 0.702              | 0.017 |
| 1         | 0.698              | 0.019 | 0.1       | 0.701              | 0.021 |
| 10        | 0.423              | 0.023 | 1         | 0.67               | 0.022 |
| 100       | 0.225              | 0.023 | 10        | 0.67               | 0.021 |
| 1000      | 0.151              | 0.023 | 100       | 0.607              | 0.019 |
| Bound 0 % | 0.124              | 0.021 | Bound 0 % | 0.124              | 0.017 |

TTX and KLH with several concentrations were separately analyzed on the same ELISA plate. Background OD (absence of biotin-TTX) is expressed as “Bound 0%”.
